# Supplementary material
Source: PubMed Central journal article supplement (PMC9179171)
Supplement: NIHMS1795225-supplement-1.pdf [file NIHMS1795225-supplement-1.pdf]

|                                              | Pre-pandemic<br>CTRLS | SARS-CoV-2<br>PI | PI + VAX      | 2X VAX          | 3X VAX      |
|----------------------------------------------|-----------------------|------------------|---------------|-----------------|-------------|
| <b>Total number of subjects</b>              | 32                    | 54               | 39            | 210             | 24          |
| <b>Gender (n)</b>                            |                       |                  |               |                 |             |
| <b>Male</b>                                  | 11                    | 26               | 18            | 67              | 7           |
| <b>Female</b>                                | 21                    | 28               | 21            | 143             | 17          |
| <b>Age, (mean ± SD)</b>                      | 51.5 ± 24.4           | 50.8 ± 13.05     | 49.46 ± 12.97 | 50.4 ± 11.7     | 56.8 ± 21.5 |
| <b>Vaccine Manufacturer (n)</b>              |                       |                  |               |                 |             |
| <b>Pfizer</b>                                | NA                    | NA               | 20            | 128             | 12          |
| <b>Moderna</b>                               | NA                    | NA               | 19            | 82              | 11          |
| <b>Days post VAX (mean ± SD)</b>             | NA                    | NA               | 125.0 ± 80.4  | 170.2 ±<br>75.8 | 33.3 ± 24.7 |
| <b>Days post COVID onset<br/>(mean ± SD)</b> | NA                    | 189.9 ± 107.3    | 289.8 ± 108.7 | NA              | NA          |

**Supplemental Table 1. Demographics of study participants.** NA – not applicable.

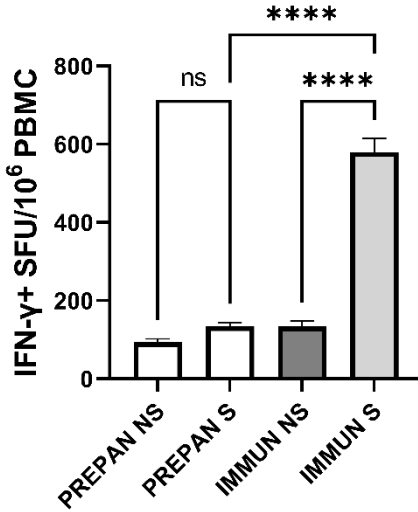

**Supplemental Figure 1.** 10<sup>6</sup> PBMCs per well were cultured without peptide stimulation (NS) or stimulated with Spike peptide pools from USA-WA1/2020 for 42h, IFN- $\gamma$  response was measured by FLUORISpot. Prepandemic samples N=32, immunized samples N=326. Data presented as mean  $\pm$  standard error of the mean. Kruskal-Wallis test with Dunn's correction for multiple comparisons.

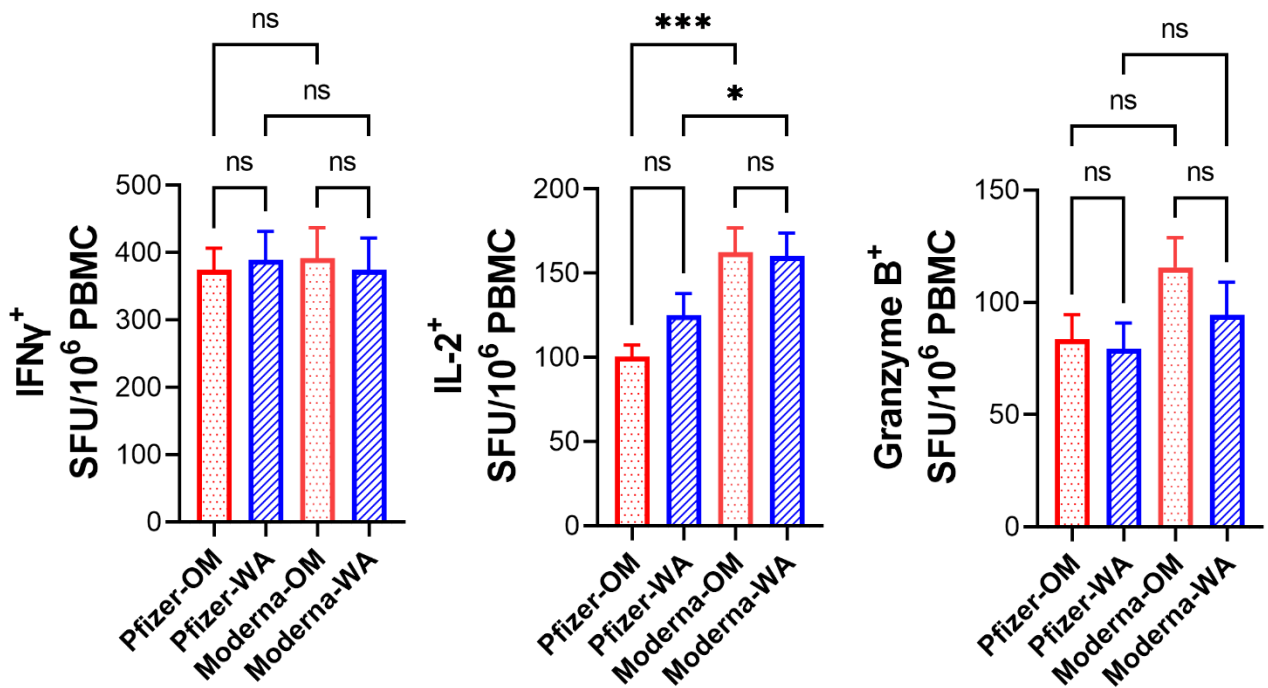

**Supplemental Figure 2. Reduced IL-2 responses in recipients of Pfizer mRNA**

**SARS-Cov-2 vaccines** No difference in number of IFN- $\gamma$  SFU between recipients of Pfizer and Moderna manufactured mRNA vaccines (left panel). IL-2 SFU were reduced in recipients of Pfizer's mRNA vaccines in response to both USA-WA1/2020 and Omicron peptide pool (middle panel). No difference in number of GrB SFU between groups (right panel). Pfizer n=139, Moderna n=93. Data presented as mean  $\pm$  standard error of the mean. Kruskal-Wallis's test with Dunn's correction for multiple comparisons

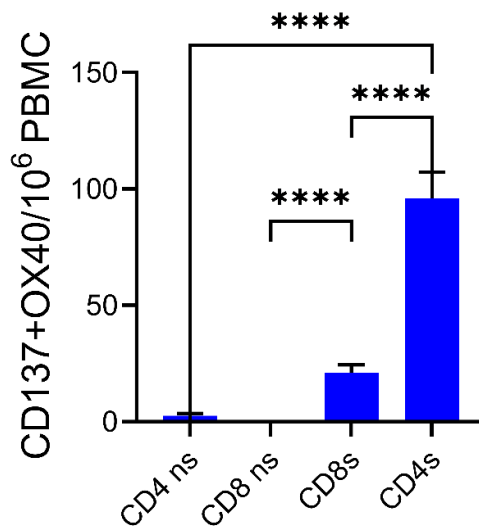

**Supplemental Figure 3.** Spike peptide pool induces expression of CD137 and OX-40 on CD3+CD4+ or CD3+CD8+ cells, n=96. Data presented as mean  $\pm$  standard error of the mean. Kruskal-Wallis test with Dunn's correction for multiple comparisons.
